# Supplementary material for: Evaporation of liquid droplets of nano- and micro-meter size as a function of molecular mass and intermolecular interactions: experiments and molecular dynamics simulations
Source: Royal Society of Chemistry journal article supplement (doi:10.1039/c7sm00804j), 2017-01-01
Supplement: c7sm00804j1.pdf [file c7sm00804j1.pdf]

## Electronic Supplementary Information:

### Evaporation of liquid droplets of nano- and micro-meter size as a function of molecular mass and intermolecular interactions: experiment and molecular dynamics simulations

Robert Hołyst, Marek Litniewski and Daniel Jakubczyk

#### Simulation parameters and results

|    | $\sigma_{11}$ | $T_b$ | $\rho_2^0$ | $m_1$ | $A$  | $\chi^2/\sigma_{11}^2$ | $T_{\text{liq}}$ | $\rho_{\text{liq}}\sigma_{11}^2$ | $R(0)$ | $\lambda$ |
|----|---------------|-------|------------|-------|------|------------------------|------------------|----------------------------------|--------|-----------|
| 1  | 1.0           | 1.05  | 0.0150     | 1.0   | 3.01 | 0.0014                 | 0.720            | 0.846                            | 36.9   | 17.4      |
| 2  | 1.0           | 1.05  | 0.0150     | 3.0   | 4.49 | 0.0051                 | 0.734            | 0.844                            | 36.7   | 17.4      |
| 3  | 1.0           | 1.05  | 0.0150     | 8.0   | 9.08 | 0.0072                 | 0.725            | 0.847                            | 37.1   | 17.4      |
| 4  | 1.0           | 1.15  | 0.0150     | 1.0   | 2.84 | 0.0030                 | 0.741            | 0.840                            | 37.4   | 17.7      |
| 5  | 1.0           | 1.15  | 0.0150     | 2.0   | 3.52 | 0.0023                 | 0.752            | 0.838                            | 36.7   | 17.7      |
| 6  | 1.0           | 1.15  | 0.0150     | 3.0   | 4.34 | 0.0031                 | 0.752            | 0.838                            | 37.3   | 17.7      |
| 7  | 1.0           | 1.15  | 0.0150     | 5.0   | 6.16 | 0.0106                 | 0.749            | 0.839                            | 37.3   | 17.7      |
| 8  | 1.0           | 1.15  | 0.0150     | 8.0   | 8.84 | 0.0054                 | 0.742            | 0.842                            | 37.5   | 17.7      |
| 9  | 1.0           | 1.25  | 0.0150     | 1.0   | 2.72 | 0.0040                 | 0.760            | 0.834                            | 36.2   | 18.0      |
| 10 | 1.0           | 1.35  | 0.0150     | 1.0   | 2.60 | 0.0052                 | 0.777            | 0.829                            | 35.5   | 18.3      |
| 11 | 1.0           | 1.45  | 0.0150     | 1.0   | 2.51 | 0.0090                 | 0.793            | 0.823                            | 34.7   | 18.5      |
| 12 | 1.0           | 1.55  | 0.0150     | 1.0   | 2.38 | 0.0088                 | 0.808            | 0.818                            | 35.1   | 18.7      |
| 13 | 2.0           | 0.85  | 0.0065     | 3.0   | 3.88 | 0.071                  | 0.755            | 0.838                            | 73.6   | 38.5      |
| 14 | 2.0           | 0.85  | 0.0065     | 8.0   | 7.35 | 0.090                  | 0.747            | 0.841                            | 73.8   | 38.5      |
| 15 | 2.0           | 1.05  | 0.0065     | 3.0   | 3.60 | 0.039                  | 0.838            | 0.810                            | 74.6   | 40.4      |
| 16 | 2.0           | 1.05  | 0.0065     | 8.0   | 6.62 | 0.046                  | 0.827            | 0.814                            | 75.1   | 40.4      |
| 17 | 2.0           | 1.05  | 0.0065     | 20.0  | 13.5 | 0.026                  | 0.808            | 0.822                            | 76.4   | 40.4      |
| 18 | 2.0           | 1.25  | 0.0065     | 3.0   | 3.41 | 0.104                  | 0.901            | 0.786                            | 75.5   | 41.7      |
| 19 | 2.0           | 1.25  | 0.0065     | 8.0   | 6.05 | 0.082                  | 0.891            | 0.791                            | 73.7   | 41.7      |
| 20 | 2.0           | 1.25  | 0.0065     | 20.0  | 12.5 | 0.047                  | 0.856            | 0.801                            | 74.8   | 41.7      |

Table S1. Simulation parameters and results.  $A$  – the parameter from the fit to Eq.(5);  $R(t)$  obtained directly from the simulations (and corresponding  $\chi^2$ ). The data used for analysis included sizes  $R(t)$  down to  $R = 10\sigma_{11}$ .  $R(0)$  is the droplet radius at time  $t=0$  i.e. when the system attained quasi-stationary stage of evaporation.  $T_{\text{liq}}$ ,  $\rho_{\text{liq}}$  are the liquid droplet temperature and density averaged from  $t = 0$  to  $t_{\mu}$ :  $R(t_{\mu}) = 25\sigma_{11}$ .  $\lambda$  is the mean free path (eq(4)) for gas 2 at  $\rho_2^0$ ,  $T_b$ .

#### The gas liquid equilibrium properties and the critical temperature

| $T_{\text{eq}}$ | $p_{\text{eq}}$ | $\rho_{\text{liq}}^{\text{eq}}$ | $\rho_{\text{gas}}^{\text{eq}}$ |
|-----------------|-----------------|---------------------------------|---------------------------------|
| 0.375           | 0.0007          | 0.836                           | 0.0020                          |
| 0.400           | 0.0014          | 0.820                           | 0.0036                          |
| 0.423           | 0.0025          | 0.802                           | 0.0063                          |
| 0.452           | 0.0043          | 0.781                           | 0.0105                          |
| 0.477           | 0.0069          | 0.759                           | 0.0165                          |

|       |       |       |        |
|-------|-------|-------|--------|
| 0.501 | 0.010 | 0.736 | 0.0244 |
| 0.526 | 0.015 | 0.709 | 0.0358 |
| 0.552 | 0.021 | 0.676 | 0.0521 |
| 0.564 | 0.025 | 0.658 | 0.0627 |
| 0.575 | 0.029 | 0.638 | 0.0750 |

Table S2. The gas liquid equilibrium temperature, pressure and densities for the potential given by Eq.(1) for  $\epsilon_{ii} = \sigma_{ii} = 1.0$ . The simulation were performed using two phase constant energy and volume MD NVE simulations [1] for the total number of particles  $N = 1.6 \times 10^5$ .

The critical temperature for the potential (1) was estimated as  $T_c \approx 0.65\epsilon_{ii}$  by comparing the density temperature dependences from Table S2 to that for LJ potential for  $r_c = 2.5$  [S1].

### The self-diffusion constant in the vapor

The self-diffusion constant,  $D$ , for the gas of particles 2 was determined from the Einstein formula (S1) [1] by performing MD NVE simulations for  $N = 10^6$ .

$$D = \lim_{t \rightarrow \infty} \left( \frac{1}{6Nt} \sum_{i=1}^N (\mathbf{r}_i(t) - \mathbf{r}_i(0))^2 \right) \quad (\text{S1})$$

where  $\mathbf{r}_i(t)$  denotes the position of the  $i$ -th particle at time  $t$ .

| $\rho$ | $T$   | $D$   |
|--------|-------|-------|
| 0.0065 | 0.800 | 32.03 |
| 0.0065 | 1.025 | 38.25 |
| 0.0065 | 1.357 | 46.31 |
| 0.0065 | 1.717 | 54.26 |
| 0.0150 | 0.801 | 13.84 |
| 0.0150 | 1.025 | 16.52 |
| 0.0150 | 1.355 | 20.02 |
| 0.0150 | 1.715 | 23.45 |

Table S3. The self-diffusion constant,  $D$ , for a pure gas 2 at different densities  $\rho$  and temperatures  $T$ .

### The heat conductivity in the vapor

The heat conductivity,  $\kappa_v$ , for the gas of particles 2 was measured using a direct method proposed by Muller-Plathe (MP) [12] with the modifications as in supplementary information to Refs. 7, 8. The simulations were performed for total number of particles  $N = 2457600$ . Both the total energy and the momentum of the system were conserved. The values of  $\kappa_v$  evaluated from the formula of MP (S2) are given in Table S4.

$$\kappa_v = \frac{\Delta E_k}{2 \langle \partial T / \partial z \rangle L_x L_y \Delta t} \quad (\text{S2})$$

The relative errors in  $\kappa_v$  are much larger than that in  $D$ . For dilute gases,  $\kappa_v$  and  $D$  can be approximated by very similar formulas [S2]. In order to reduce the errors from (S2), the values of  $\kappa_v$  used in Eq (5) were correlated with the self-diffusion constant  $D$  using:

$$\kappa_v = \alpha \rho D \quad (\text{S3})$$

The  $\alpha$  constant were estimated from Tables S3 and S4 as 2.78 for  $\rho = 0.015$  and 2.65 for  $\rho = 0.0065$ .

| $\rho$ | $T$   | $\kappa_v$ |
|--------|-------|------------|
| 0.0065 | 0.859 | 0.582      |
| 0.0065 | 1.026 | 0.650      |
| 0.0065 | 1.240 | 0.758      |
| 0.0150 | 1.033 | 0.700      |
| 0.0150 | 1.133 | 0.739      |
| 0.0150 | 1.325 | 0.809      |
| 0.0150 | 1.545 | 0.905      |

Table S4. Thermal conductivity coefficient  $\kappa_v$  for a pure gas 2 at different densities  $\rho$  and temperatures  $T$ . All expressed in standard L-J units.

### The enthalpy of evaporation for glycols used in experiments

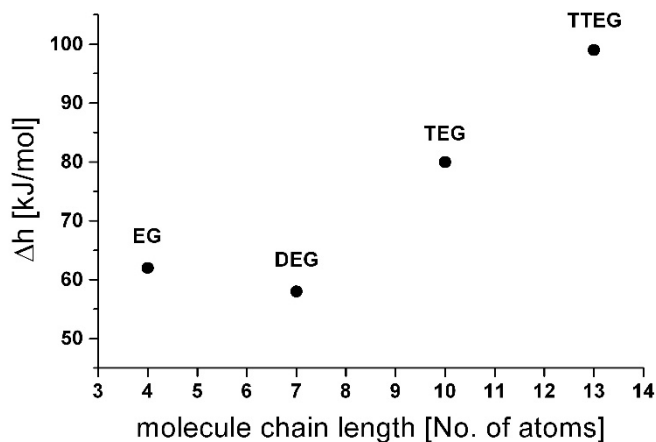

**Fig.7** The enthalpy of evaporation used to estimate the interaction energy of molecules forming a liquid droplet at 273 K. The compounds are as follows: ethylene glycol (EG); diethylene glycol (DEG); triethylene glycol (TEG) and tetraethylene glycol (TTEG). (S3)

## References

S1 – J. Vrabec, G. K. Kedia, G. Fuchs and H. Hasse, *Mol. Phys.* **104**, 1509 (2006)

S2 – S. Chapman and T.G. Cowling, *The Mathematical Theory of Non-Uniform Gases* (Cambridge University Press 1990)

S3 -- J.B.Pedley, R.D. Naylor and R.B.Kirby, *Thermochemical Data of Organic Compounds*, Chapman and Hall, New York, 1986, 1-792.
